# Supplementary material
Source: Elsevier journal article supplement (https://www.sciencedirect.com/science/article/pii/S1134282X16000294)
Supplement: mmc1 [file S1134282X16000294:mmc1.pdf]

## Anexo

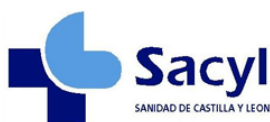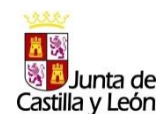

### ESCALA DE SATISFACCIÓN DE PACIENTES HOSPITAL DE DÍA

1. ¿Qué impresión tiene usted sobre el tratamiento que está a punto de completar?
  3. Bueno
  2. Bastante bueno
  1. Regular
  0. Malo
2. ¿Cree usted que el personal del Hospital de Día ha entendido lo que usted pensaba o sentía durante el tratamiento?
  3. Mucho
  2. Bastante
  1. Poco
  0. Nada
3. ¿Se ha sentido ayudado por el personal del Hospital de Día?
  3. Mucho
  2. Bastante
  1. Poco
  0. Nada
4. ¿Cree usted que el lugar donde se encuentra el Hospital de Día facilita su asistencia al mismo?
  3. Mucho
  2. Bastante
  1. Poco
  0. Nada
5. ¿Qué esperaba obtener de éste tratamiento?
  3. Mejorar aspectos concretos de mi vida y mi relación con los demás
  2. Obtener ayuda
  1. Curarme
  0. Tener un lugar para hacer actividades y ocupar mi tiempo
6. ¿Ha obtenido lo que esperaba?
  3. Mucho
  2. Bastante
  1. Poco
  0. Nada
7. Respecto a los síntomas de su enfermedad:
  3. No tiene ningún síntoma
  2. Tiene menos síntomas que antes
  1. Tiene los mismos síntomas que antes
  0. Tiene más síntomas que antes
8. En relación con el conocimiento de la enfermedad, ha avanzado:
  3. Mucho
  2. Bastante
  1. Algo
  0. Nada

\*Adaptación de la Escala de satisfacción de pacientes y familiares del Hospital de Día Psiquiátrico de Salamanca
